# Supplementary material for: Comprehensive Adsorption Studies of Doxycycline and Ciprofloxacin Antibiotics by Biochars Prepared at Different Temperatures
Source: PubMed Central journal article supplement (PMC5880934; doi:10.3389/fchem.2018.00080), 2018-03-27
Supplement: Presentation1.pdf [file Presentation1.pdf]

**Supplementary Information for:**

**Comprehensive adsorption studies of doxycycline and ciprofloxacin antibiotics  
by biochars prepared at different temperatures**

Zhiwei Zeng<sup>a, b, c</sup>, Xiaofei Tan<sup>a, b, \*</sup>, Yunguo Liu<sup>a, b, \*</sup>, Sirong Tian<sup>a, b</sup>, Guangming  
Zeng<sup>a, b</sup>, Luhua Jiang<sup>a, b</sup>, Shaobo Liu<sup>d, e</sup>, Jiang Li<sup>a, b</sup>, Ni Liu<sup>a, b</sup>, Zhihong Yin<sup>a, b</sup>

<sup>a</sup> College of Environmental Science and Engineering, Hunan University, Changsha 410082, P.R. China

<sup>b</sup> Key Laboratory of Environmental Biology and Pollution Control (Hunan University), Ministry of  
Education, Changsha 410082, P.R. China

<sup>c</sup> College of Architecture and Urban Planning, Hunan City University, Yiyang 413000, P.R. China

<sup>d</sup> School of Metallurgy and Environment, Central South University, Changsha 410083, PR China

<sup>e</sup> College of Environmental Science and Engineering Research, Central South University of Forestry  
and Technology, Changsha 410004, PR China

\* Correspondence: Xiaofei Tan, tanxf@hnu.edu.cn; Yunguo Liu, hnliuyunguo@gmail.com

**16 pages, 5 tables, and 10 figures.**

**Table S1.** Details of the tetracycline hydrochloride used in this study

|                     | Doxycycline                                                                                                                              | Ciprofloxacin                                                                       |
|---------------------|------------------------------------------------------------------------------------------------------------------------------------------|-------------------------------------------------------------------------------------|
| IUPAC name          | (4S,4aR,5S,5aR,6R,12aR)-4-(dimethylamino)-1,5,10,11,12a-pentahydroxy-6-methyl-3,12-dioxo-4a,5,5a,6-tetrahydro-4H-tetracene-2-carboxamide | 1-cyclopropyl-6-fluoro-4-oxo-7-piperazin-1-ylquinoline-3-carboxylic acid            |
| Commercial name     | Doxycycline                                                                                                                              | Ciprofloxacin                                                                       |
| CAS number          | 564-25-0                                                                                                                                 | 85721-33-1                                                                          |
| Appearance          | Yellow crystalline powder                                                                                                                | Faint to light yellow crystalline powder                                            |
| Molecular Formula   | C <sub>22</sub> H <sub>24</sub> N <sub>2</sub> O <sub>8</sub>                                                                            | C <sub>17</sub> H <sub>18</sub> FN <sub>3</sub> O <sub>3</sub>                      |
| Molecular weight    | 444.4 g/mol                                                                                                                              | 331.3 g/mol                                                                         |
| Melting point       | 201 °C                                                                                                                                   | 255-257 °C                                                                          |
| Water Solubility    | 630 mg/L                                                                                                                                 | 30000 mg/L                                                                          |
| pK <sub>a</sub>     | pK <sub>a1</sub> = 3.4, pK <sub>a2</sub> = 7.7, pK <sub>a3</sub> = 9.3                                                                   | pK <sub>a1</sub> = 6.2, pK <sub>a2</sub> = 8.8                                      |
| Molecular structure | 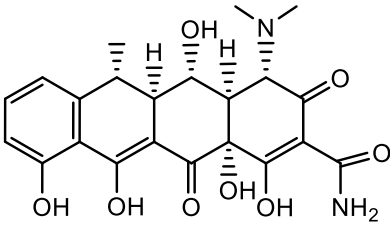                                                       |  |

**Table S2.** Physico-chemical characteristics of biochars produced at different pyrolysis temperatures

| Biochar | Elemental composition (% , mass based) <sup>a</sup> |      |       |      |      | Atomic ratios |         | BET surface area (m <sup>2</sup> /g) | Average pore diameter (nm) | Pore Volume (cm <sup>3</sup> /g) | Micropore and mesopore volume (cm <sup>3</sup> /g) |
|---------|-----------------------------------------------------|------|-------|------|------|---------------|---------|--------------------------------------|----------------------------|----------------------------------|----------------------------------------------------|
|         | C                                                   | N    | O     | P    | S    | O/C           | (N+O)/C |                                      |                            |                                  |                                                    |
| BC300   | 70.75                                               | 2.5  | 25.18 | 0.93 | 0.65 | 0.27          | 0.30    | 3.29                                 | 12.17                      | 0.0073                           | 0.0044                                             |
| BC500   | 72.57                                               | 2.52 | 23.69 | 0.72 | 0.5  | 0.24          | 0.27    | 9.95                                 | 7.86                       | 0.0098                           | 0.0069                                             |
| BC700   | 80.48                                               | 2.32 | 16.38 | 0.47 | 0.36 | 0.15          | 0.18    | 20.55                                | 6.42                       | 0.0191                           | 0.0146                                             |

<sup>a</sup> Determined by X-ray photoelectron spectroscopy (XPS).

**Table S3.** Intra-particle diffusion parameters for the adsorption of antibiotics by BC700.

|     | Sections | $k_{id}$ (mg/g h <sup>0.5</sup> ) | $c_i$ | $R_i^2$ |
|-----|----------|-----------------------------------|-------|---------|
| CIP | Section1 | 46.64                             | 3.02  | 0.857   |
|     | Section2 | 13.25                             | 15.83 | 0.974   |
|     | Section3 | 2.04                              | 33.80 | 0.987   |
| DOX | Section1 | 76.24                             | 6.06  | 0.797   |
|     | Section2 | 12.74                             | 28.24 | 0.986   |
|     | Section3 | 4.13                              | 47.19 | 0.970   |

**Table S4.** Boyd plot parameters for the adsorption of antibiotics by BC700.

|     | Sections | $k_{id}$ | $c_i$ | $R_i^2$ |
|-----|----------|----------|-------|---------|
| CIP | Section1 | 0.47     | 0.13  | 0.967   |
|     | Section2 | 0.092    | 1.16  | 0.990   |
| DOX | Section1 | 0.24     | 0.19  | 0.989   |
|     | Section2 | 0.13     | 0.69  | 0.992   |

**Table S5.** Maximum adsorption capacities of various adsorbents for CIP and DOX.

|     | Adsorbent                                              | Temperature (K) | $q_{\max}$ (mg/g) | References                   |
|-----|--------------------------------------------------------|-----------------|-------------------|------------------------------|
| CIP | rice straw biochar (700 °C)                            | 298             | 48.80             | In this study                |
|     | magnetic herbal biochar                                |                 | 47.62             | (Kong et al., 2017)          |
|     | biocomposite fibers of graphene oxide/calcium alginate |                 | 66.25             | (Wu et al., 2013)            |
|     | magnetic carbon composite                              | 303             | 90.1              | (Mao et al., 2016)           |
| DOX | rice straw biochar (700 °C)                            | 298             | 170.36            | In this study                |
|     | Cu(II) impregnated biochar                             | 298             | 52.374            | (Liu et al., 2017)           |
|     | graphene nanosheet                                     | 297.15          | 110               | (Rostamian & Behnejad, 2018) |
|     | NaY zeolite                                            | 303             | 252.12            | (Ali & Ahmed, 2017)          |

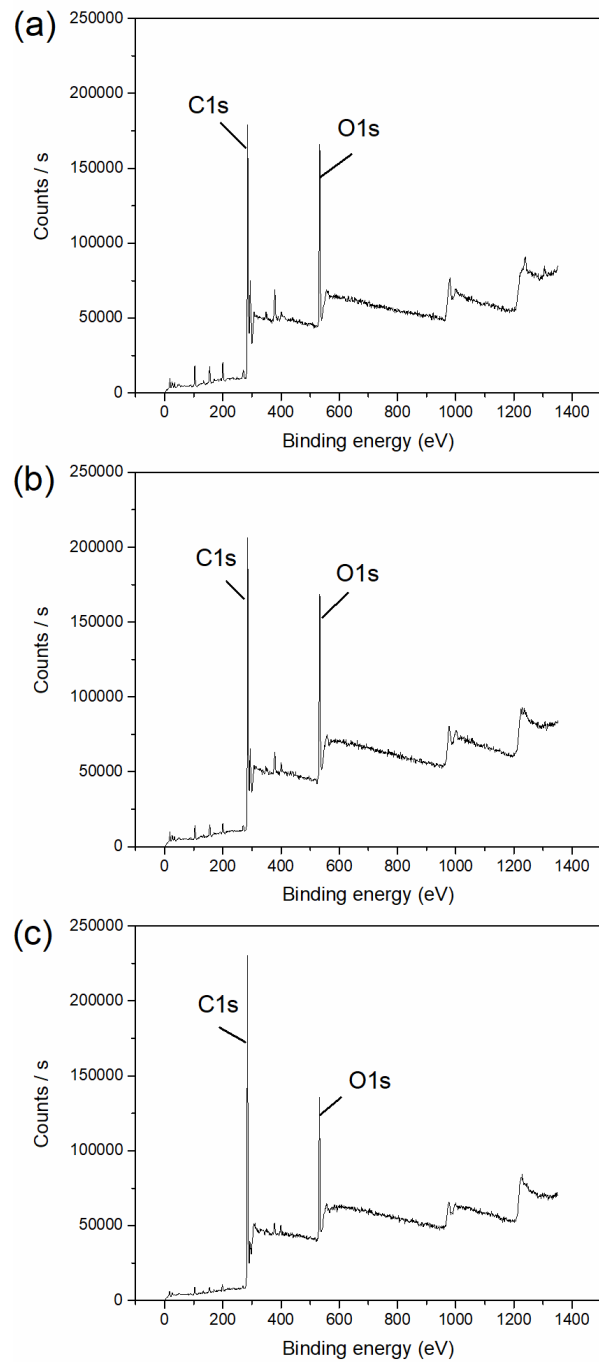

**Fig. S1.** XPS survey spectra of biochar produced at (a) 300 °C, (b) 500 °C, and (c) 700 °C.

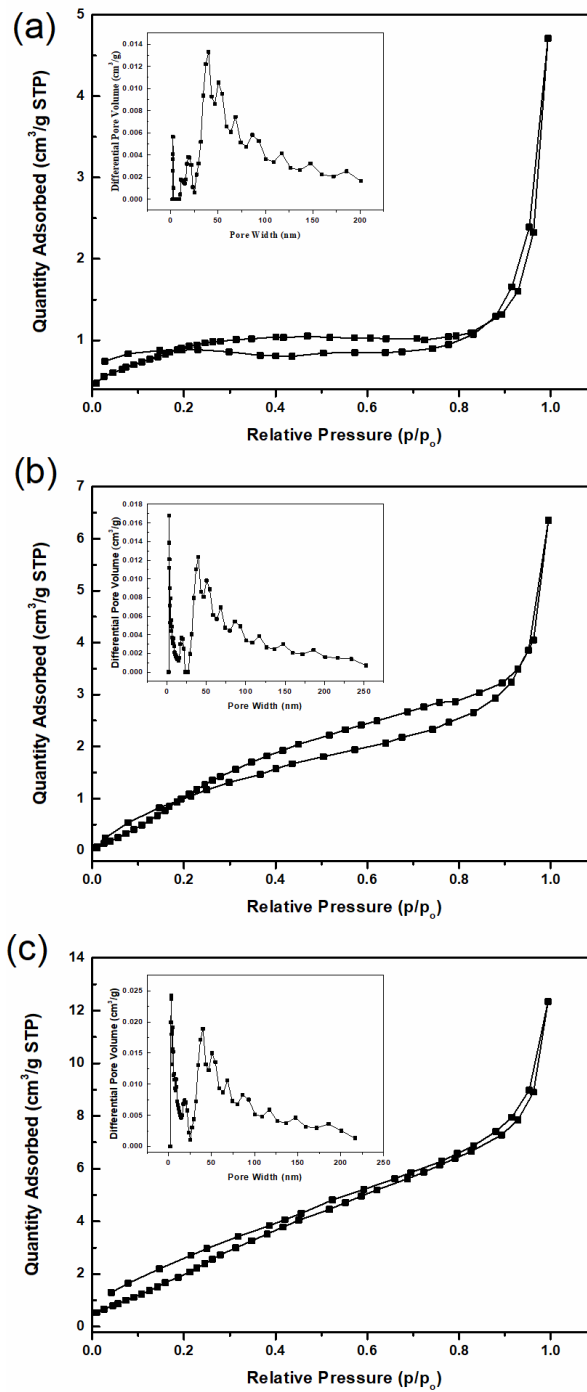

**Fig. S2.** The nitrogen adsorption-desorption isotherms and pore size distribution of (a) BC300, (b) BC500, and (c) BC700.



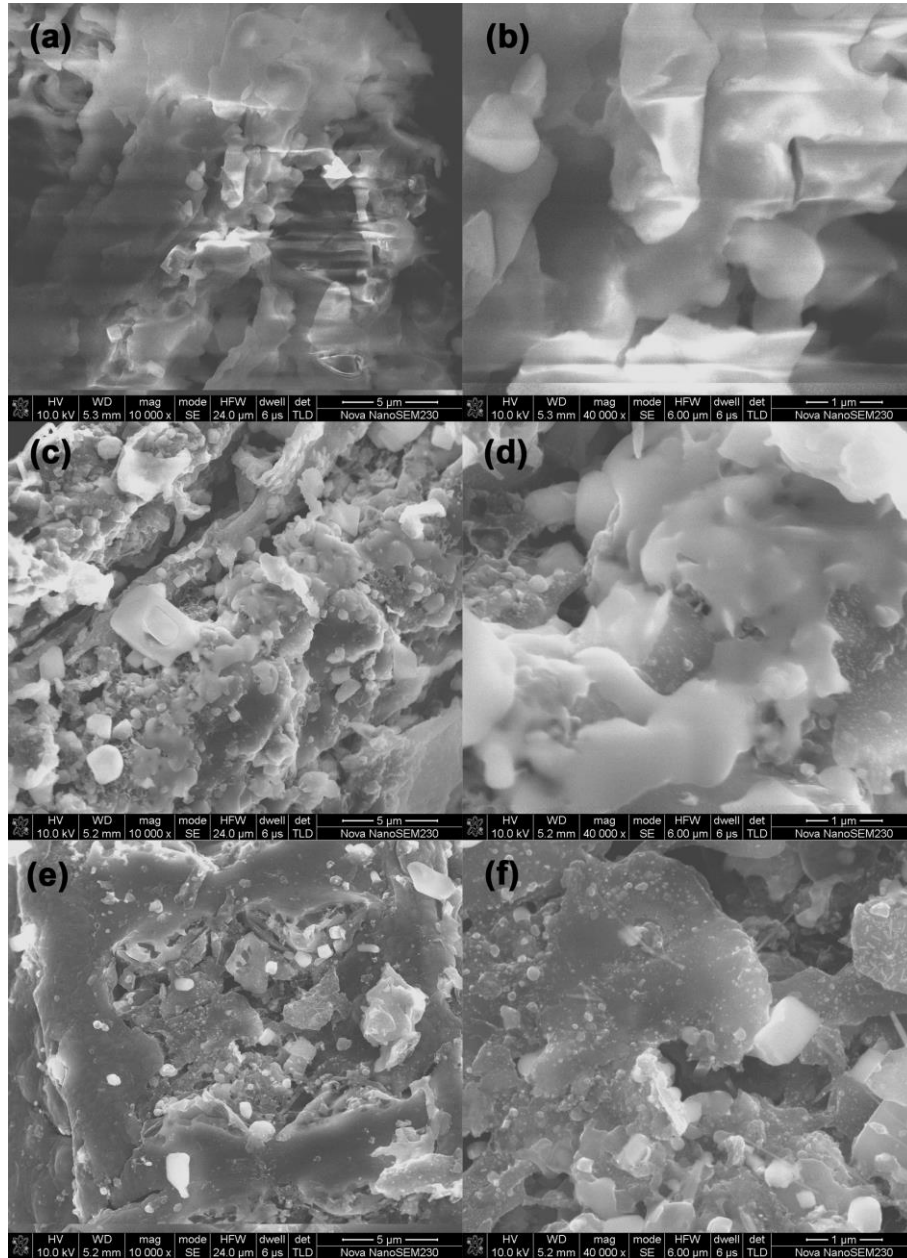

**Fig. S3.** SEM micrograph results of (a) BC300, (b) BC500, and (c) BC700.

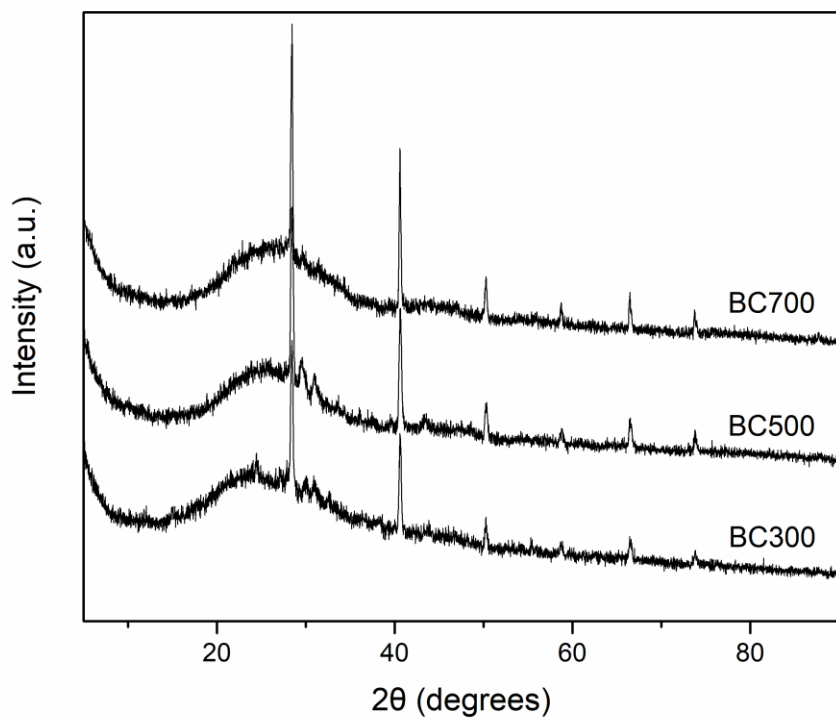

**Fig. S4.** X-ray diffraction (XRD) patterns of different biochars.

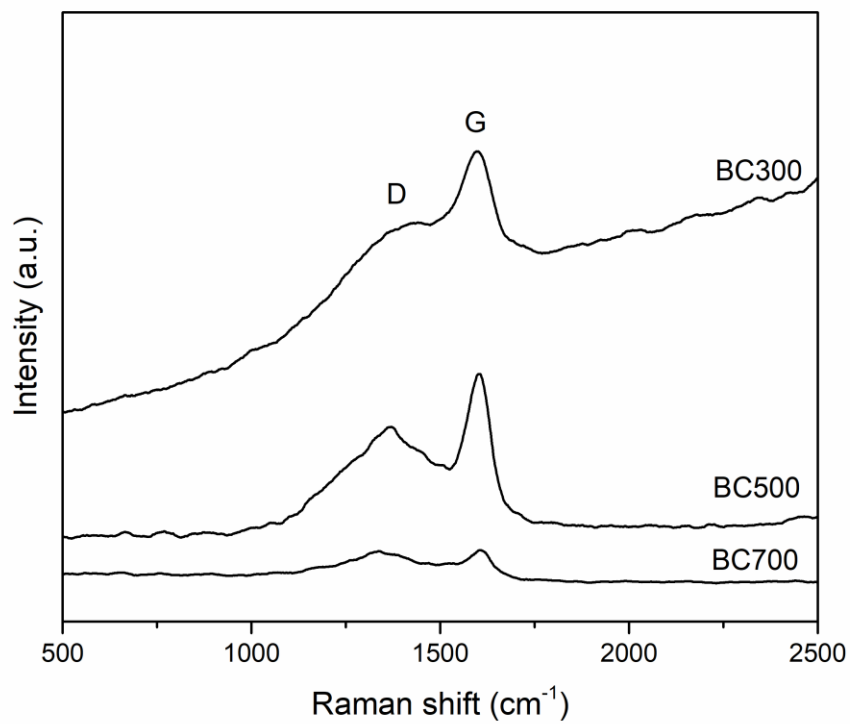

**Fig. S5.** Raman spectra of different biochars.

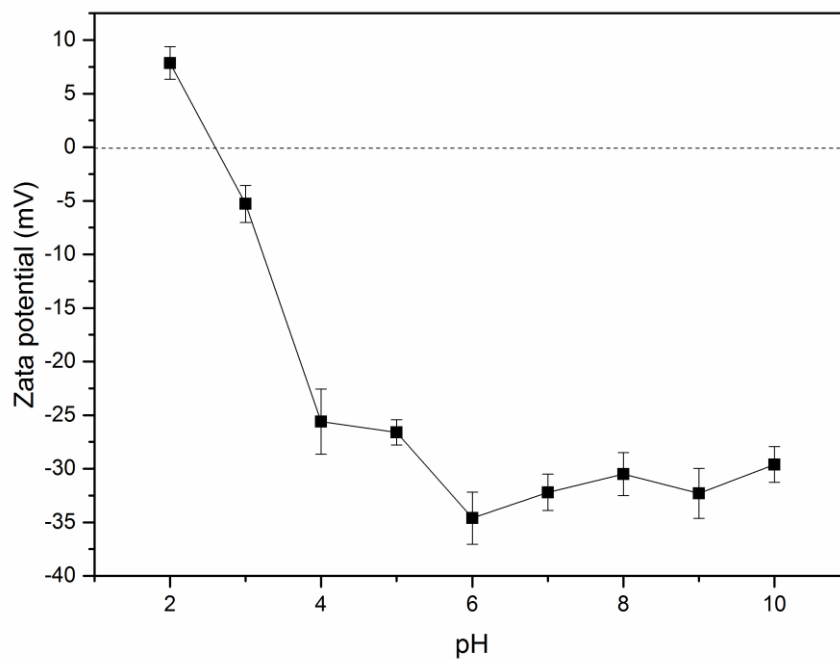

**Fig. S6.** The zeta-potential-pH curves of BC700.

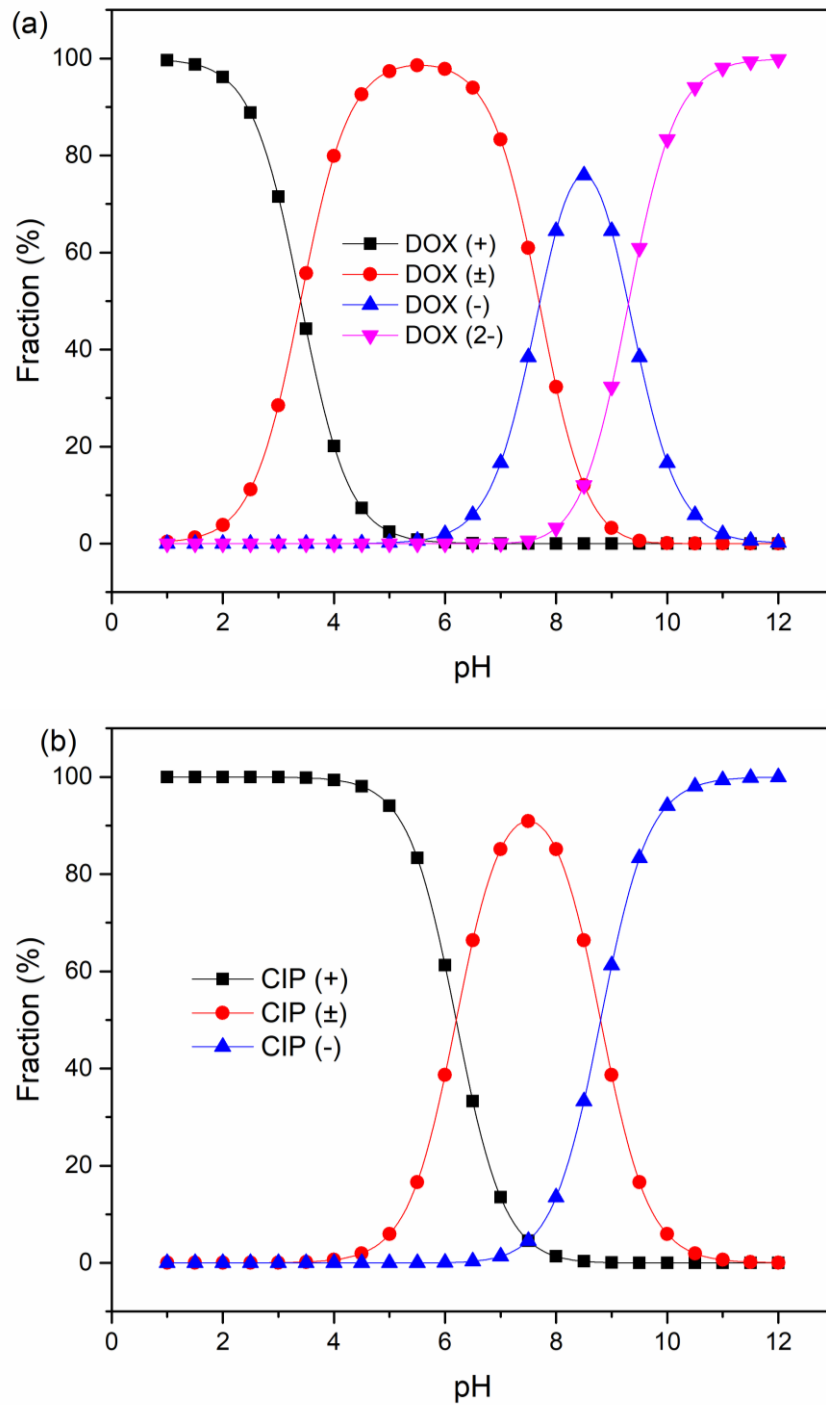

**Fig. S7.** The speciation of DOX (a) and CIP (b) under different pH conditions.

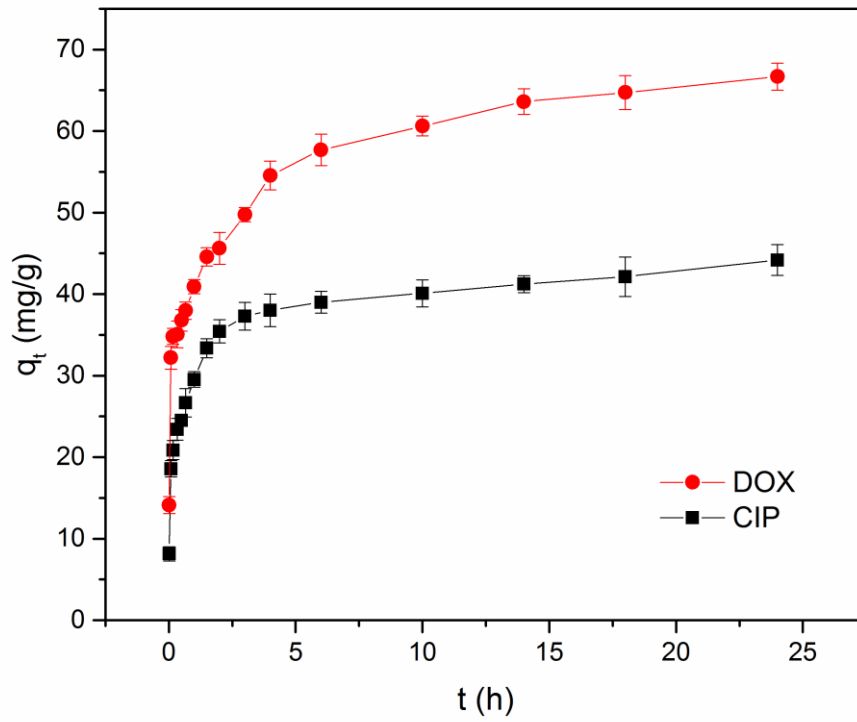

**Fig. S8.** The effect of contact time on CIP and DOX adsorption.

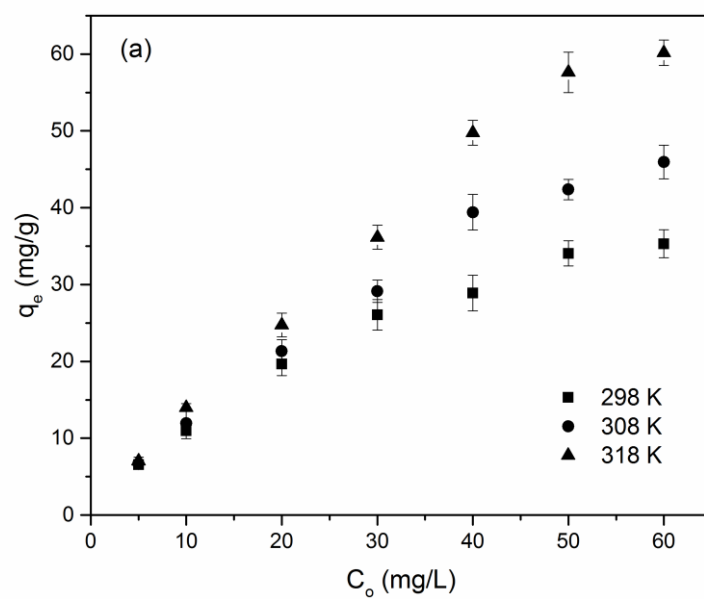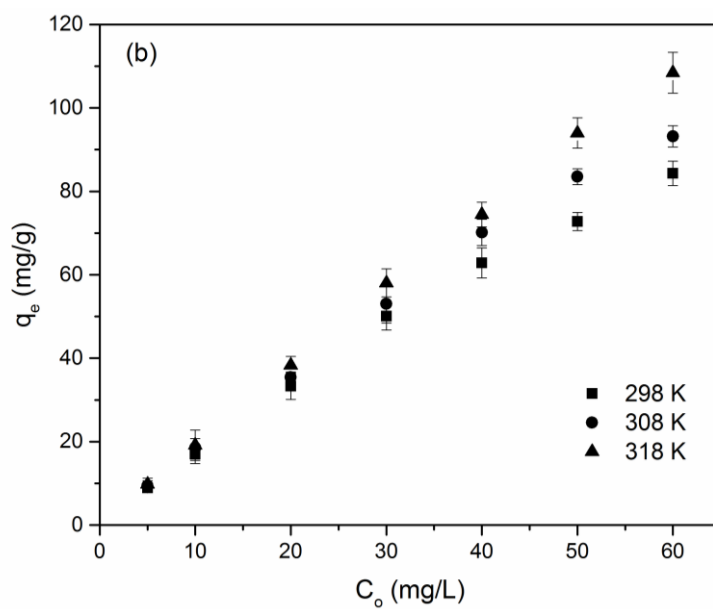

**Fig. S9.** The effect of antibiotic concentration on CIP (a) and DOX (b) adsorption.

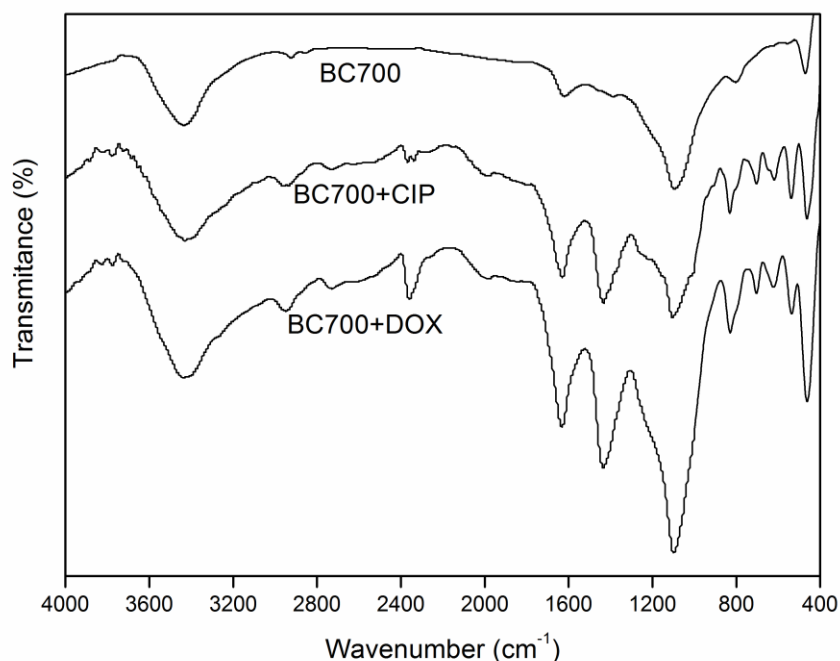

**Fig. S10.** The FTIR spectra of BC700 before and after adsorption of DOX and CIP.

## Reference

- Ali, M.M.M., Ahmed, M.J. 2017. Adsorption behavior of doxycycline antibiotic on NaY zeolite from wheat (*Triticum aestivum*) straws ash. *Journal of the Taiwan Institute of Chemical Engineers*, **81**, 218-224.
- Kong, X., Liu, Y., Pi, J., Li, W., Liao, Q., Shang, J. 2017. Low-cost magnetic herbal biochar: characterization and application for antibiotic removal. *Environmental Science and Pollution Research*, **24**(7), 6679-6687.
- Liu, S., Xu, W.-h., Liu, Y.-g., Tan, X.-f., Zeng, G.-m., Li, X., Liang, J., Zhou, Z., Yan, Z.-l., Cai, X.-x. 2017. Facile synthesis of Cu(II) impregnated biochar with enhanced adsorption activity for the removal of doxycycline hydrochloride from water. *Science of The Total Environment*, **592**, 546-553.
- Mao, H., Wang, S., Lin, J.-Y., Wang, Z., Ren, J. 2016. Modification of a magnetic carbon composite for ciprofloxacin adsorption. *Journal of Environmental Sciences*, **49**, 179-188.
- Rostamian, R., Behnejad, H. 2018. Insights into doxycycline adsorption onto graphene nanosheet: a combined quantum mechanics, thermodynamics, and kinetic study. *Environmental Science and Pollution Research*, **25**(3), 2528-2537.
- Wu, S., Zhao, X., Li, Y., Zhao, C., Du, Q., Sun, J., Wang, Y., Peng, X., Xia, Y., Wang, Z., Xia, L. 2013. Adsorption of ciprofloxacin onto biocomposite fibers of graphene oxide/calcium alginate. *Chemical Engineering Journal*, **230**, 389-395.
